# Supplementary material
Source: publisher site journal article supplement (https://jhr.pensoft.net/article/59365/download/suppl/38/)
Supplement: Supplementary file 1

Suppl. material 8. Figure S6

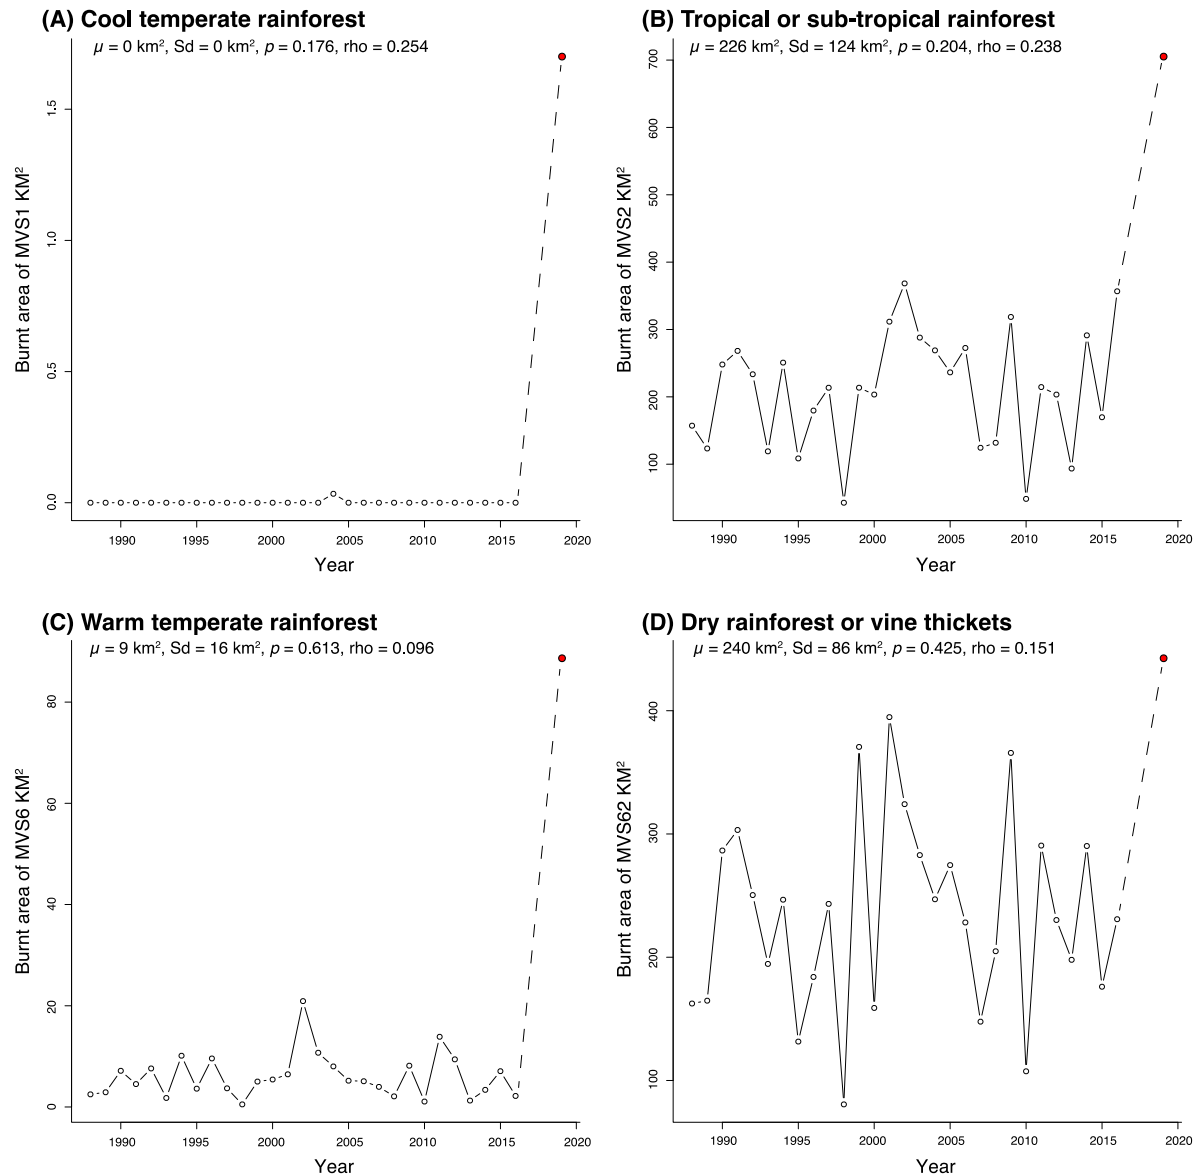

**Figure S6.** The area of Major Vegetation Subgroups (MVS) **A** one (cool temperate rainforest), **B** two (Tropical or Sub-Tropical Rainforest), **C** six (warm temperate rainforest) and **D** 62 (dry rainforest or vine thickets) burnt by year from 1988 to 2016 and the 2019-20 fire season (red). The mean ( $\mu$ ), standard deviation (Sd), and  $p$  and  $\rho$  values from a two-sided Spearman's rank correlation test are included. Hashed lines indicates missing data from the 2017 and 2018 fire seasons.
